# Supplementary material for: Insulin-mediated suppression of lipolysis in adipose tissue and skeletal muscle of obese type 2 diabetic men and men with normal glucose tolerance
Source: PubMed Central journal article supplement — Diabetologia. 2013 Aug 2;56(10):2255–65. doi: 10.1007/s00125-013-2995-9 (PMC3764323; doi:10.1007/s00125-013-2995-9), 2013-08-02
Supplement: 125_2013_2995_MOESM7_ESM.pdf [file 125_2013_2995_MOESM7_ESM.pdf]

**ESM Table 2** Skeletal muscle membrane DAG composition

|                | <b>NGT</b>  | <b>T2D</b>  | <b>p-value*</b> |
|----------------|-------------|-------------|-----------------|
| 14:0           | 15.85±23.72 | 10.23±16.83 | 0.578           |
| 15:0           | 1.45±1.47   | 3.47±3.43   | 0.156           |
| <b>16:0</b>    | 25.33±9.51  | 44.91±16.70 | <b>0.014</b>    |
| 16:1n-7tr      | 0.33±0.60   | 1.74±3.27   | 0.267           |
| 16:1n-7        | 1.60±2.62   | 0.79±2.07   | 0.487           |
| <b>17:0</b>    | 2.55±5.15   | 12.02±10.99 | <b>0.051</b>    |
| <b>18:0</b>    | 8.42±8.64   | 24.95±16.41 | <b>0.028</b>    |
| <b>18:1tr</b>  | 0.63±0.61   | 2.58±2.53   | <b>0.067</b>    |
| 18:1n-9        | 41.60±18.19 | 45.68±16.53 | 0.635           |
| 18:1n-7        | 3.73±1.22   | 4.38±2.05   | 0.454           |
| 18:2n-6tr      | 0.48±1.15   | 3.63±4.59   | 0.097           |
| 18:2n-6        | 14.12±9.66  | 8.17±4.73   | 0.127           |
| 20:0           | 0.59±0.93   | 1.83±1.72   | 0.099           |
| <b>18:3n-6</b> | 0.48±0.80   | 3.31±3.24   | <b>0.044</b>    |
| 20:1n-9        | 0.84±0.69   | 0.76±0.68   | 0.840           |
| 18:3n-3        | 0.49±0.84   | 0.92±1.02   | 0.370           |
| 21:00          | 0.48±0.69   | 0.99±1.01   | 0.249           |
| 18:4n-3        | -           | 1.22±1.93   | 0.116           |
| <b>22:0</b>    | 0.27±0.41   | 1.89±0.85   | <b>0.001</b>    |
| 20:3n-6        | 0.55±1.09   | 0.94±1.76   | 0.599           |
| 20:4n-6        | 0.93±1.63   | 0.34±0.61   | 0.334           |
| 23:0           | 0.08±0.24   | 1.31±2.97   | 0.283           |
| 22:2n-6        | 0.57±0.98   | 1.69±1.64   | 0.119           |
| 24:0           | 0.18±0.55   | 0.59±1.23   | 0.413           |
| 24:1n-9        | 0.33±0.99   | 0.75±1.71   | 0.549           |
| 22:4n-6        | 0.10±0.20   | 0.19±0.53   | 0.675           |
| 24:2n-6        | 0.98±1.42   | 0.57±0.60   | 0.459           |
| 22:5n-3        | 0.75±0.84   | 0.97±1.14   | 0.662           |
| 22:6n-3        | 0.51±0.99   | 1.12±1.69   | 0.392           |

Values are means ± SD. \* p-value NGT vs. type 2 diabetic (T2D) men, unpaired samples t-test.
