# Supplementary figures and images for: Insulin-mediated suppression of lipolysis in adipose tissue and skeletal muscle of obese type 2 diabetic men and men with normal glucose tolerance
Source: PubMed Central journal article supplement — Diabetologia. 2013 Aug 2;56(10):2255–65. doi: 10.1007/s00125-013-2995-9 (PMC3764323; doi:10.1007/s00125-013-2995-9), 2013-08-02

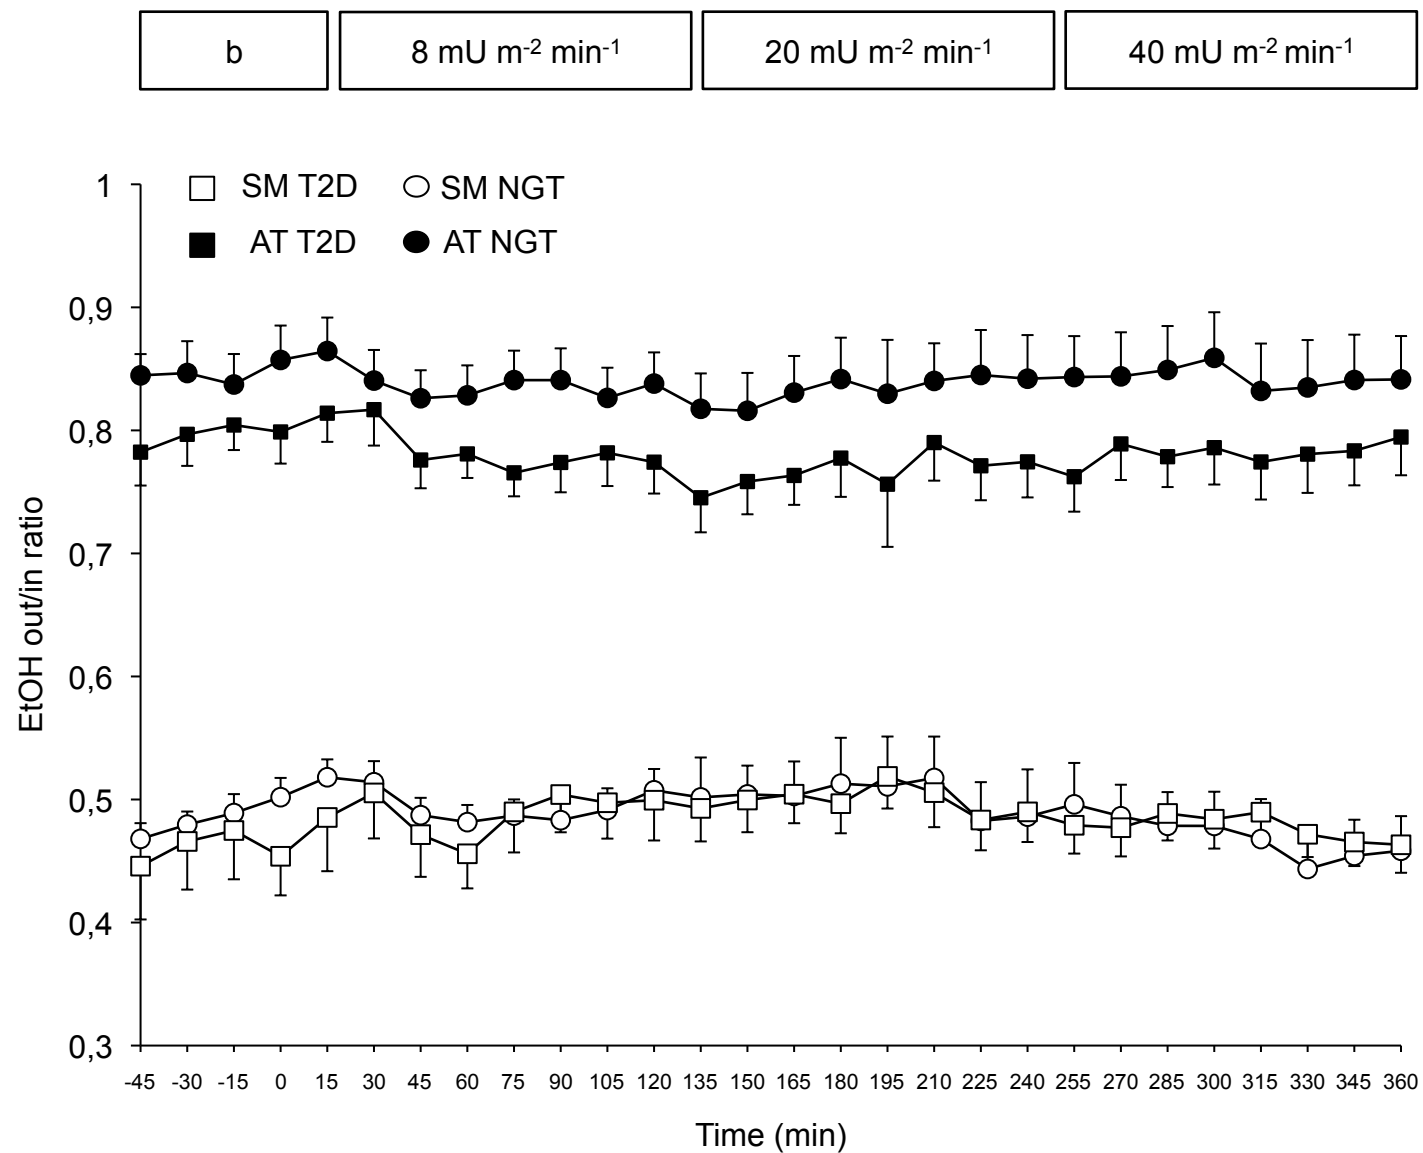

ESM Fig. 1

Supplement: 125_2013_2995_MOESM1_ESM.pdf [file 125_2013_2995_MOESM1_ESM.pdf]
